# Supplementary material
Source: PubMed Central journal article supplement (PMC4104059)
Supplement: mmc1.pdf [file mmc1.pdf]

# High-throughput phenotyping of *Chlamydomonas* swimming mutants based on nanoscale video analysis

Shohei Fujita<sup>1</sup>, Takuya Matsuo<sup>2</sup>, Masahiro Ishiura<sup>2</sup>, and Masahide Kikkawa<sup>1</sup>

<sup>1</sup>Department of Cell Biology and Anatomy, Graduate School of Medicine,  
The University of Tokyo, Bunkyo-ku, Tokyo 113-0033, Japan;

<sup>2</sup>Center for Gene Research,  
Nagoya University, Furo, Chikusa, Nagoya 464-8602, Japan

May 30, 2014

## **Supporting Material**

Figure S1

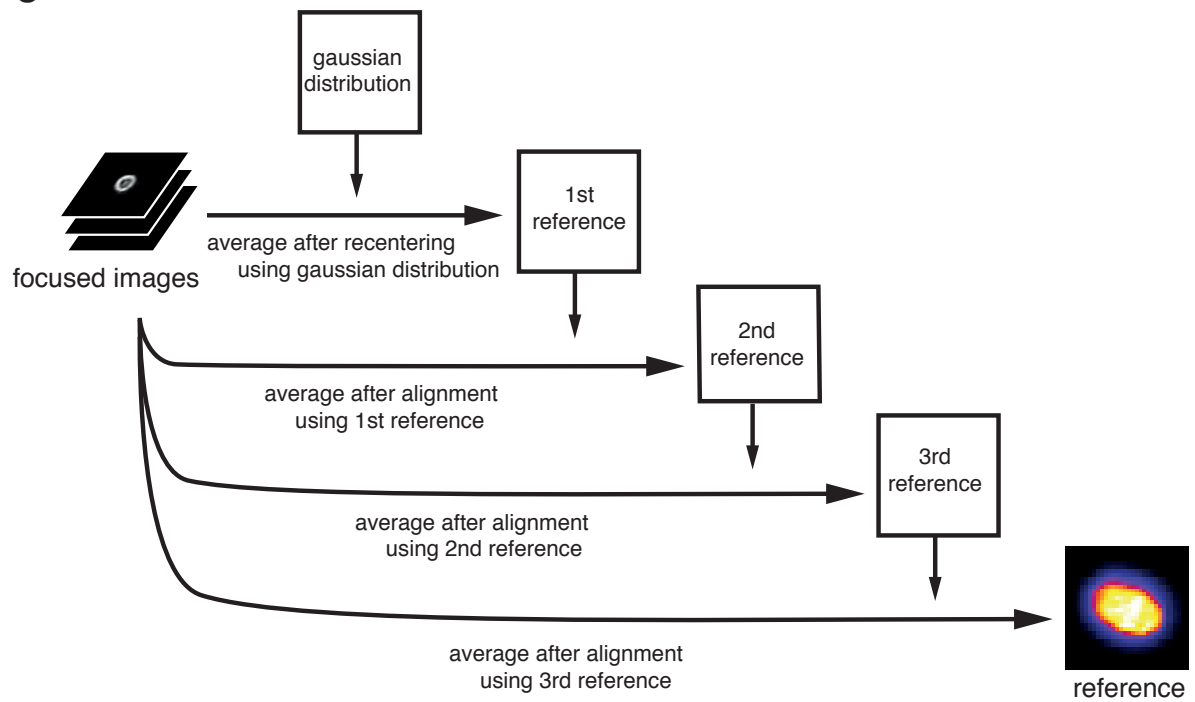

Figure S1: Flow chart of making a reference image. The best 30 in-focus images were selected from the image stack, recentered using two-dimensional Gaussian fit [1], and averaged to produce an reference image. The final reference image was obtained by iterating this procedure two to three times using the most recently generated reference image.

Figure S2

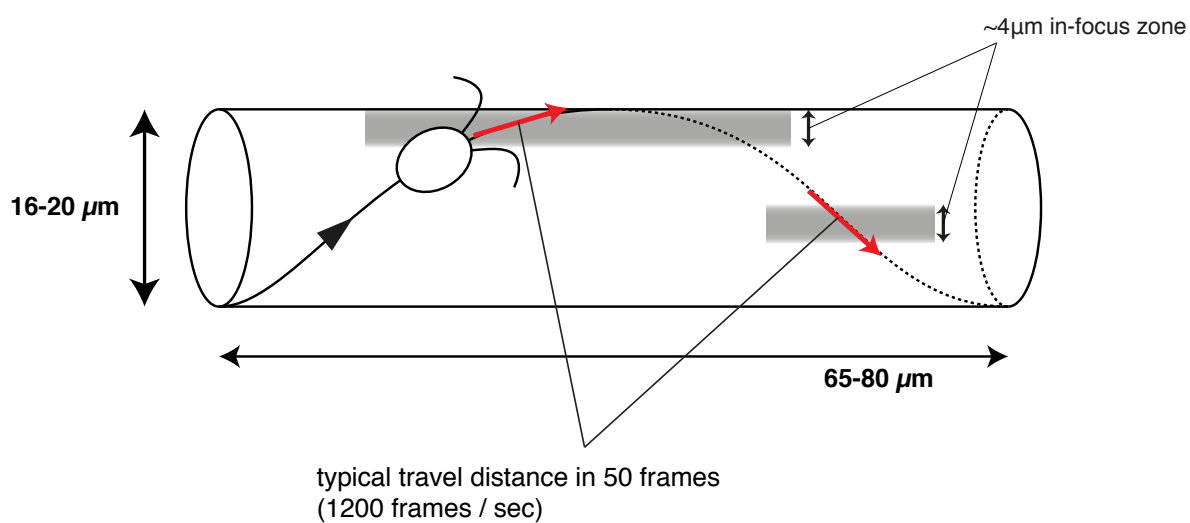

Figure S2: Relationship between the swimming path and in-focus zone. Although the swimming of *Chlamydomonas* is a 3-D helical movement [2], we have selected the beat cycles in which the cell swims parallel to the in-focus zone (gray area) by using a focus index. A *Chlamydomonas* cell typically swims about 9  $\mu\text{m}$  (red arrows) in the time window (50 frames) used for the focus index. Since the thickness of in-focus zone is about 4  $\mu\text{m}$ , the contribution of the perpendicular movement is less than 10%.

Table S1: Details of the 38 *Chlamydomonas* strains used in the screening

| Strain        | Candidate gene(s) |                  | motility defect | Known Function                                                    |
|---------------|-------------------|------------------|-----------------|-------------------------------------------------------------------|
|               | Protein ID        | Name             |                 |                                                                   |
| <i>roc9</i>   | -                 | -                | -               | -                                                                 |
| <i>roc11</i>  | No gene models    | -                | -               | -                                                                 |
| <i>roc12</i>  | 21422             | <i>VPS11</i>     | -               | -                                                                 |
| <i>roc15</i>  | No gene models    | -                | -               | -                                                                 |
| <i>roc22</i>  | 186225            | <i>FAP256</i>    | -               | Flagellar associated protein 256, a cilia tip protein             |
| <i>roc23</i>  | 173322            | -                | +               | -                                                                 |
| <i>roc28</i>  | -                 | -                | -               | -                                                                 |
| <i>roc30</i>  | 24252             | <i>ODA4</i>      | ++              | Flagellar outer dynein arm heavy chain $\beta$                    |
| <i>roc34</i>  | -                 | <i>PF9</i>       | ++              | Flagellar inner arm dynein 1 heavy chain $\alpha$                 |
| <i>roc39</i>  | 108167            | <i>MFT10</i>     | -               | -                                                                 |
| <i>roc40</i>  | No gene models    | -                | -               | -                                                                 |
| <i>roc54</i>  | 24252             | <i>ODA4</i>      | ++              | Flagellar outer dynein arm heavy chain $\beta$                    |
| <i>roc55</i>  | No gene models    | -                | -               | -                                                                 |
| <i>roc56</i>  | 94281             | -                | -               | -                                                                 |
| <i>roc59</i>  | 186304            | -                | -               | -                                                                 |
| <i>roc63</i>  | 137559            | <i>DLC7a</i>     | ++              | Flagellar outer dynein arm light chain LC7a                       |
| <i>roc66</i>  | No gene models    | -                | -               | -                                                                 |
| <i>roc69</i>  | 187830            | <i>ATRI</i>      | -               | -                                                                 |
| <i>roc74</i>  | No gene models    | -                | -               | -                                                                 |
| <i>roc75</i>  | No gene models    | -                | -               | -                                                                 |
| <i>roc76</i>  | 144235            | -                | -               | -                                                                 |
| <i>roc77</i>  | 194623            | <i>ALIX</i>      | +               | -                                                                 |
| <i>roc78</i>  | 127161            | <i>MAPKKKKK1</i> | +               | -                                                                 |
| <i>roc80</i>  | 128004            | <i>SKP1</i>      | -               | Subunit of E3 ubiquitin ligase                                    |
| <i>roc81</i>  | 176522            | -                | -               | -                                                                 |
| <i>roc86</i>  | 95232             | <i>XRN1</i>      | -               | N-terminus of single-stranded RNA 5'-3' exoribonuclease           |
| <i>roc88</i>  | -                 | -                | +               | -                                                                 |
| <i>roc93</i>  | 153922            | -                | -               | -                                                                 |
| <i>roc94</i>  | 15736             | <i>MUT-9</i>     | -               | Ser/Thr protein kinase involved in transcriptional gene silencing |
| <i>roc97</i>  | Several           | Several          | -               | -                                                                 |
| <i>roc103</i> | 131208            | <i>FAP131</i>    | -               | Flagellar associated protein 131                                  |
| <i>roc104</i> | No gene models    | -                | -               | -                                                                 |
| <i>roc105</i> | 194623            | <i>ALIX</i>      | +               | -                                                                 |
| <i>roc106</i> | 194837            | <i>FLA14</i>     | ++ (immotile)   | Flagellar outer dynein arm light chain 8                          |
| <i>roc108</i> | 186976            | -                | -               | -                                                                 |
| <i>roc110</i> | 195428            | <i>DRP2</i>      | -               | -                                                                 |
| <i>roc112</i> | 173322            | -                | +               | -                                                                 |
| <i>roc114</i> | 186976 (SC5)      | -                | -               | -                                                                 |

Figure S3

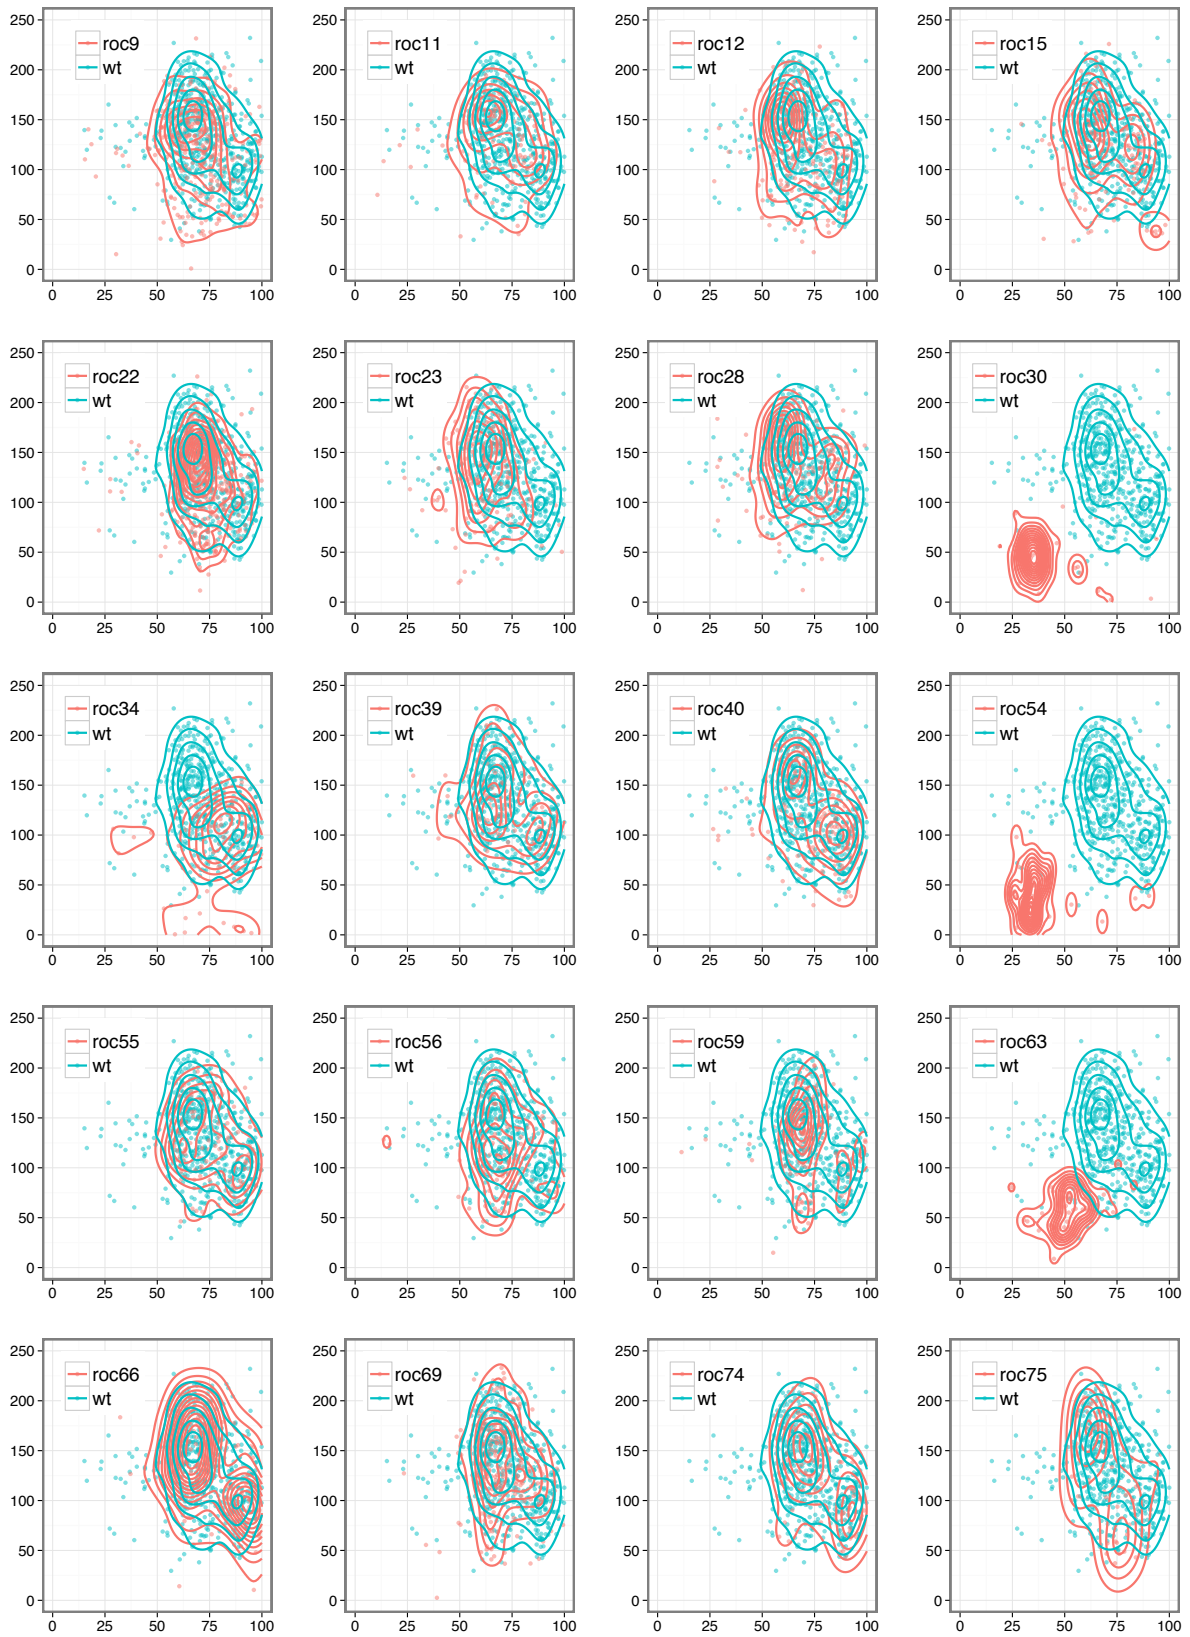

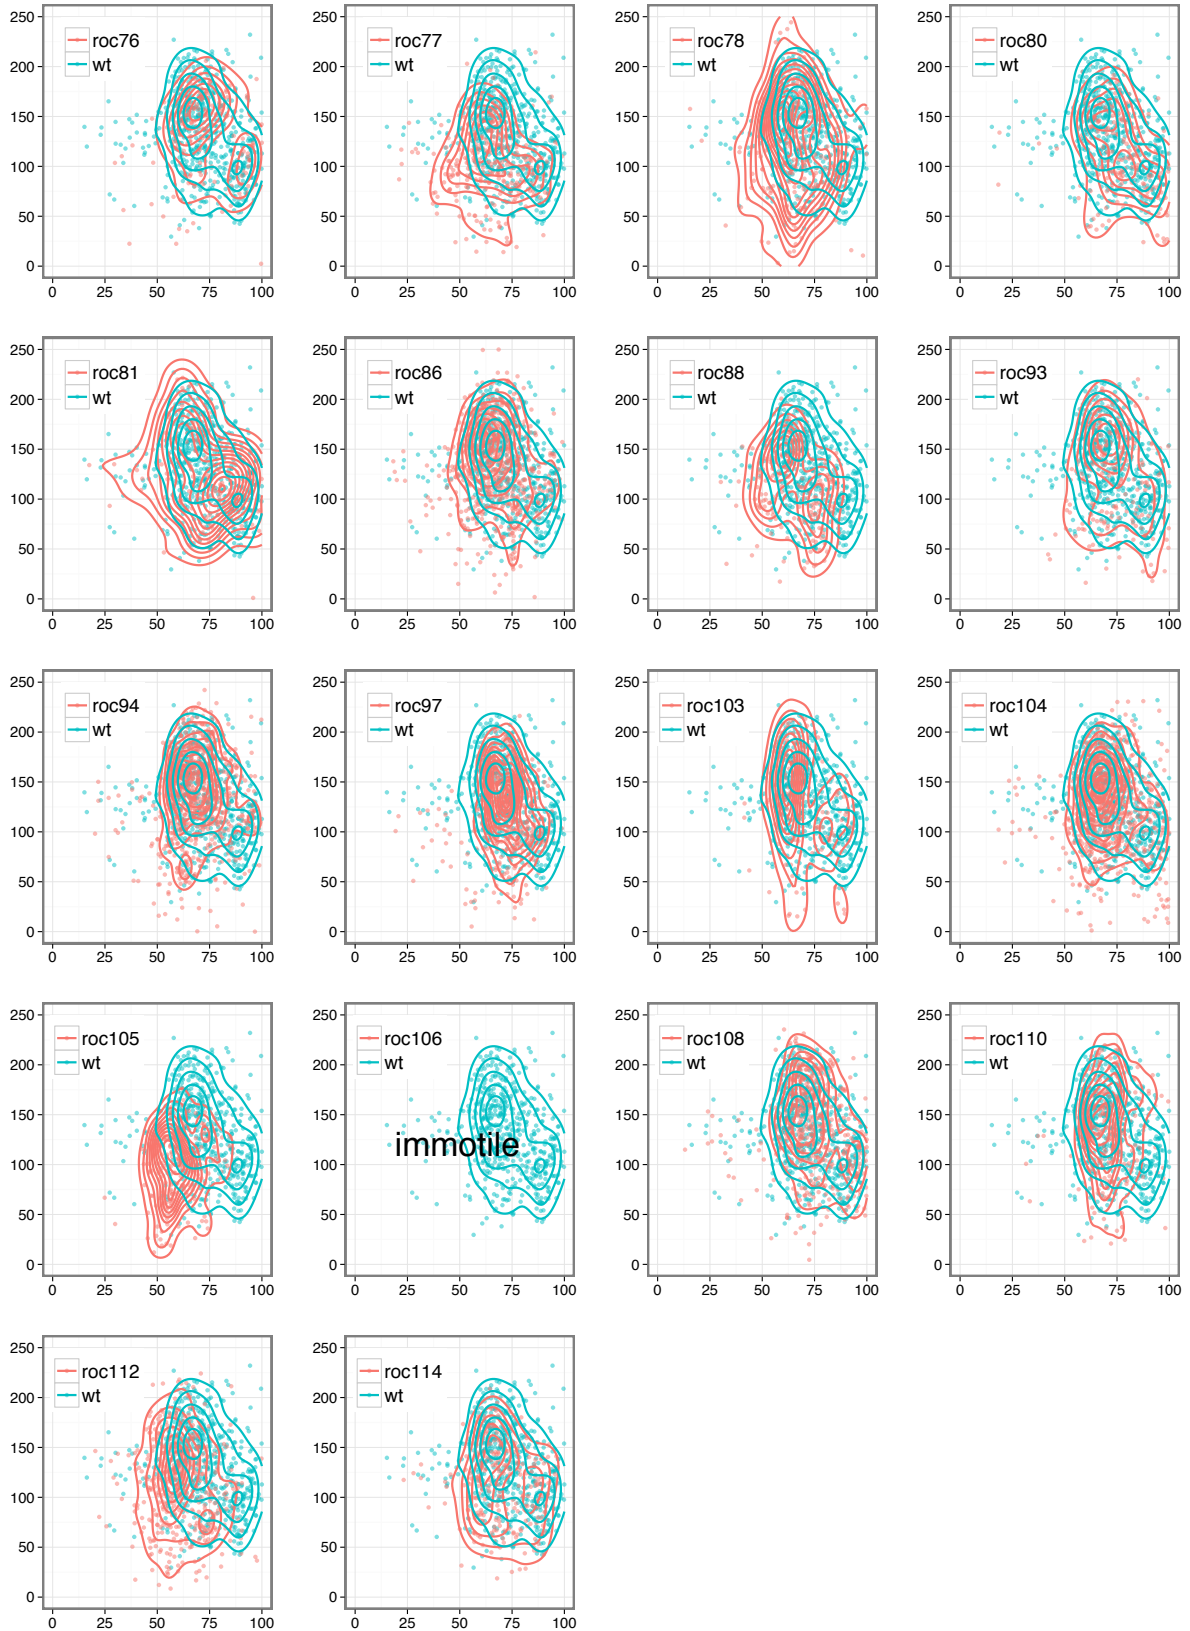

Figure S3: Screening of 38 *Chlamydomonas* strains for motility-deficient mutants using the CLONA method. Scatter plots of beat frequency  $f$  (x axis) versus average swimming velocity  $\bar{V}$  (y axis) of the beat cycles. The blue contour lines show the characteristic cluster of the control. Each dot represents one beat cycle. Focus index  $> 80$ .

**Movie S1, S2, S3, and S4** (S1) 1200 fps high speed video used for the plots shown in Fig. 3A and B. (S2) 1200 fps high speed video used for the plot shown in Fig. 3C. (S3) 1200 fps high speed video of the control strain, CBR<sup>+</sup>, used in the screening test. (S4) 1200 fps high speed video of a newly detected motility-deficient mutant, *roc105*.

## Supporting References

- [1] R. E. Thompson, D. R. Larson, and W. W. Webb. Precise nanometer localization analysis for individual fluorescent probes. *Biophys J*, 82(5):2775–2783, 2002.
- [2] K. W. Foster and R. D. Smyth. Light Antennas in phototactic algae. *Microbiol Rev*, 44(4):572–630, 1980.
